# Supplementary material for: Ag-promoted Cr/MnO2 catalyst for catalytic oxidation of low-concentration formaldehyde at room temperature
Source: Royal Society of Chemistry journal article supplement (doi:10.1039/d3cp00557g), 2023-01-01
Supplement: d3cp00557g1.pdf [file d3cp00557g1.pdf]

## *Supplementary Information*

### **Ag-promoted Cr/MnO<sub>2</sub> catalyst for catalytic oxidation of low concentration formaldehyde at room temperature**

Chaomin Duan,<sup>b</sup> Mianwu Meng,<sup>\*a,b</sup> Huang Huang,<sup>\*c</sup> Heng Wang,<sup>\*c</sup> Hua Ding<sup>b</sup> and Qi Zhang<sup>b</sup>

<sup>a</sup> *Key Laboratory of Ecology of Rare and Endangered Species and Environmental Protection, Ministry of Education, Guilin, Guangxi 541004, China*

<sup>b</sup> *College of Environment and Resources, Guangxi Normal University, Guilin, Guangxi 541004, China*

<sup>c</sup> *Guilin Huayue Entech Limited Company, Guilin 541805, China*

---

\* Corresponding authors.

E-mail addresses: [897405894@qq.com](mailto:897405894@qq.com) (M. Meng), [45703155@qq.com](mailto:45703155@qq.com) (H. Huang), [541039319@qq.com](mailto:541039319@qq.com) (H. Wang).

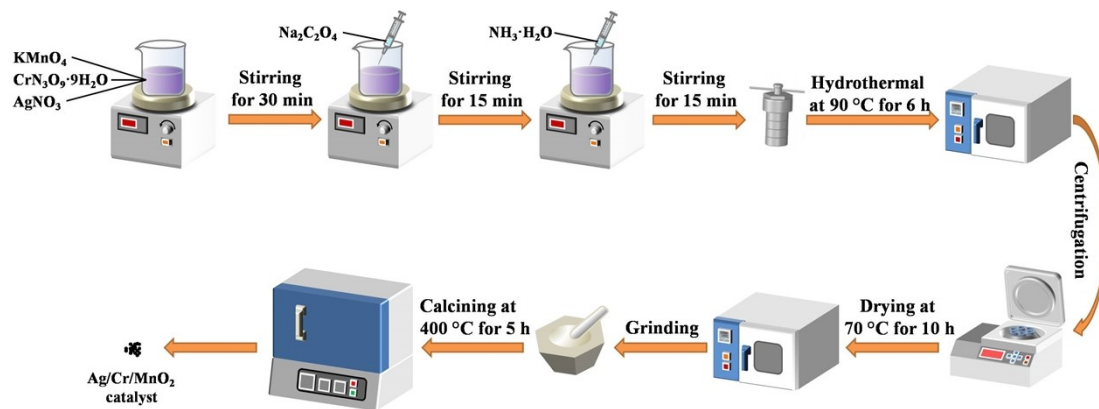

Fig. S1 Schematic illustration of the preparation process of catalysts.

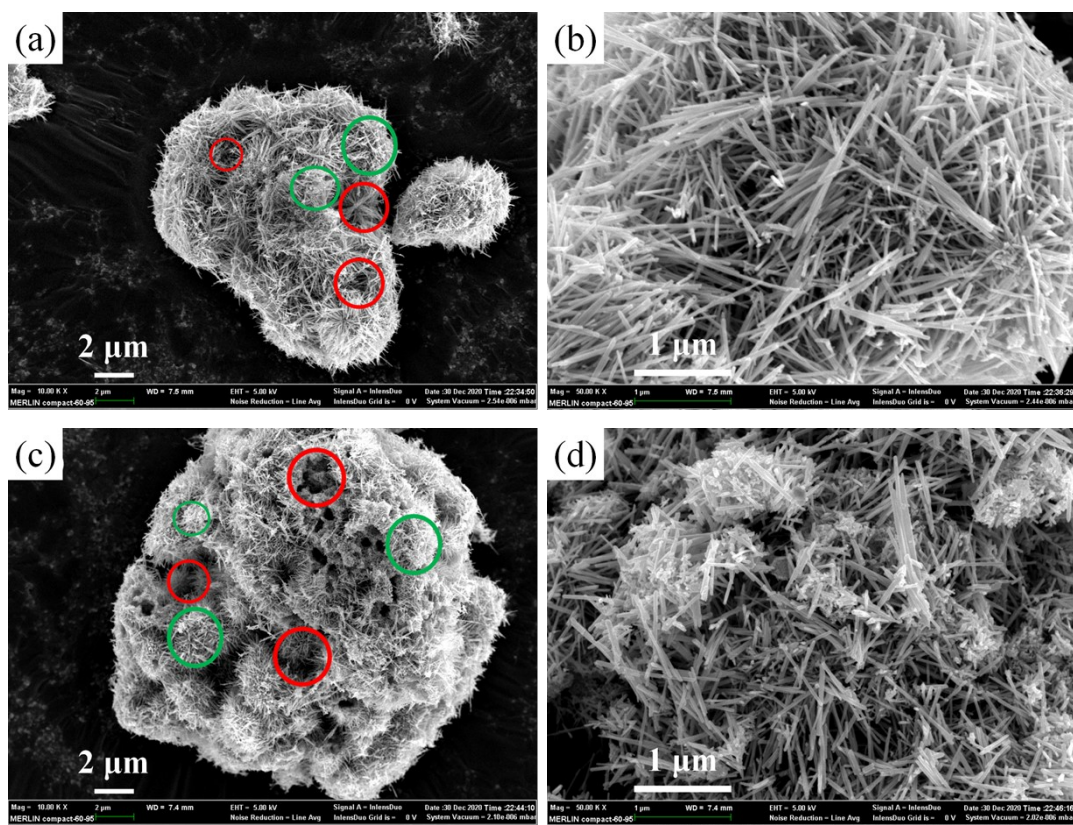

Fig. S2 SEM images of Cr/MnO<sub>2</sub> catalyst (a, b) and Ag/Cr/MnO<sub>2</sub> catalyst (c, d).

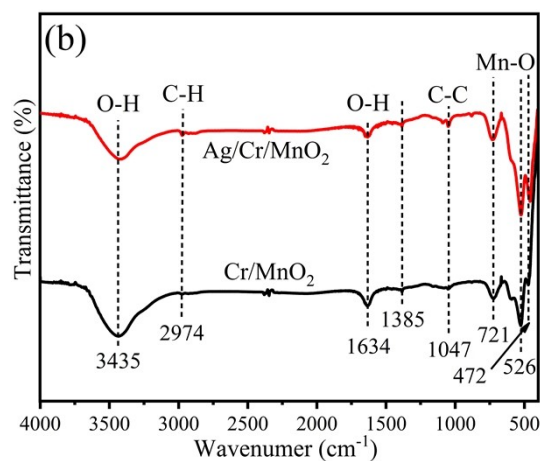

**Fig. S3** FTIR spectra of catalysts.

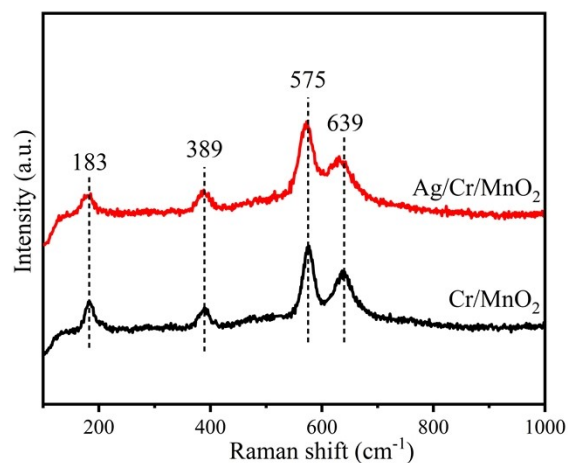

**Fig. S4** Raman spectra of catalysts.

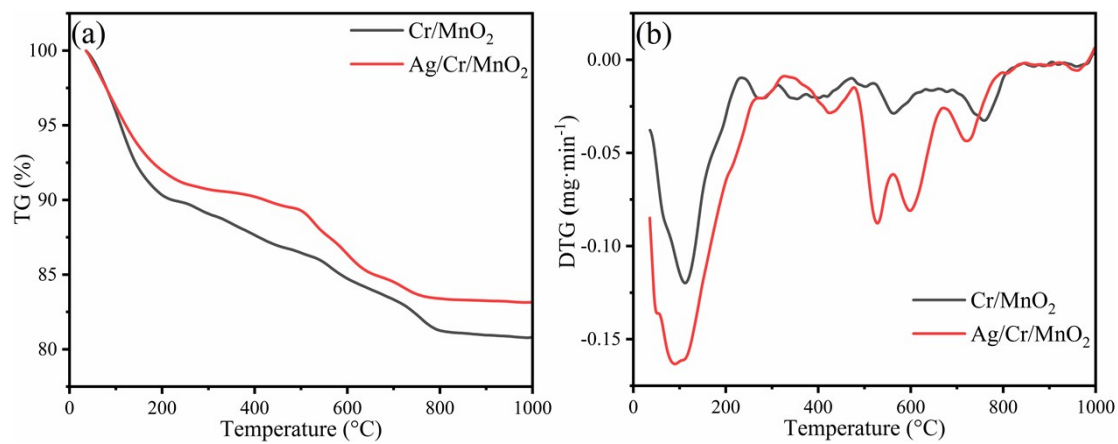

**Fig. S5** Thermo-gravimetric analysis and derivative thermogravimetry (DTG) curves of catalysts.

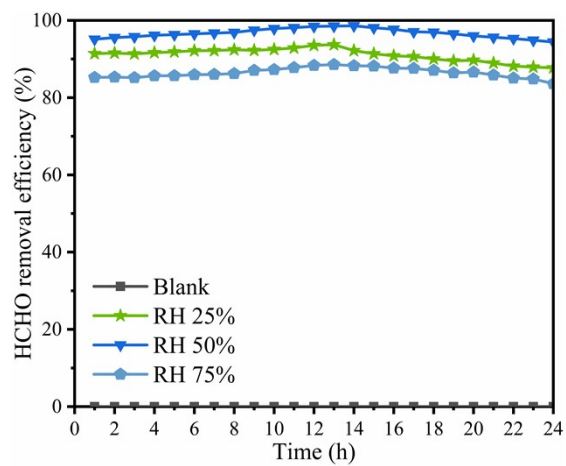

**Fig. S6** HCHO removal performance of Ag/Cr/MnO<sub>2</sub> catalyst at different humidity.
